# Supplementary material for: Evidence of slow millennial cliff retreat rates using cosmogenic nuclides in coastal colluvium
Source: Copernicus journal article supplement (doi:10.5194/egusphere-2023-3020), 2024-01-08
Supplement: Supplementary file 1 [file egusphere-2023-3020-supplement.pdf]

# Evidence of slow millennial cliff retreat rates using cosmogenic nuclides in coastal colluvium

## Supplemental Material

RÉMI BOSSIS, VINCENT REGARD, SÉBASTIEN CARRETIER & SANDRINE CHOY

### 1. SAMPLE PROCESSING AND $^{10}\text{Be}$ MEASUREMENTS

After sieving at 0.5-1 mm, the magnetic part of the sample was removed with a magnetic separator (Frantz). The chemical treatment then begins by a series of acid attacks with a mixture of concentrated hydrochloric ( $\text{HCl}$ ) and hexafluorosilicic ( $\text{H}_2\text{SiF}_6$ ) acids to remove all non-quartz minerals. When the quartz was extracted, meteoric  $^{10}\text{Be}$  was removed by three partial dissolutions with concentrated hydrofluoric acid ( $\text{HF}$ ). The decontaminated quartz was finally totally dissolved with concentrated hydrofluoric acid ( $\text{HF}$ ) after adding 500  $\mu\text{L}$  of  $^9\text{Be}$  carrier solution (Scharlau, [ $^9\text{Be}$ ] = 1000  $\mu\text{g g}^{-1}$ ). The resulting solutions were evaporated until dryness and the samples were recovered with hydrochloric acid. Then, the samples were precipitated with concentrated ammonia before a successive separation through an anion exchange column to remove the iron and a cation exchange column to discard the Boron and to recover the Beryllium. Finally, the eluted Be was precipitated to  $\text{Be}(\text{OH})_2$  with concentrated ammonia. This work was carried out at GET (Géosciences Environnement Toulouse).

Then,  $\text{Be}(\text{OH})_2$  was oxidized to BeO. After target preparation by mixing Niobium powder with the BeO oxide, the  $^{10}\text{Be}/^9\text{Be}$  ratios were measured by Accelerator Mass Spectrometry (AMS) at the French National AMS Facility ASTER of CEREGE in Aix-en-Provence [1]. The measured  $^{10}\text{Be}/^9\text{Be}$  ratios were calibrated against a house standard STD-11 with an assigned value of (1.191

Table S1.  $^{10}\text{Be}$  concentration measurements. "< DL" means "Below detection limit".

| Sample       | Lat (°N)  | Long (°E) | Altitude (m) | Quartz mass (g) | $^9\text{Be}$ added mass (mg) | $^9\text{Be}$ added mass (atoms) | $^9\text{Be}$ added mass error (atoms) | Measured $^{10}\text{Be}/^9\text{Be}$ ratio | Measured $^{10}\text{Be}/^9\text{Be}$ error | $^{10}\text{Be}/^9\text{Be}$ after blank correction | Uncertainty (%) | $^{10}\text{Be}$ concn. (atoms/g) | $^{10}\text{Be}$ concn. uncertainty (atoms/g) |
|--------------|-----------|-----------|--------------|-----------------|-------------------------------|----------------------------------|----------------------------------------|---------------------------------------------|---------------------------------------------|-----------------------------------------------------|-----------------|-----------------------------------|-----------------------------------------------|
| <b>Run 1</b> |           |           |              |                 |                               |                                  |                                        |                                             |                                             |                                                     |                 |                                   |                                               |
| VERM1        | 42.49926  | 3.13484   | 5            | 2.94            | 0.5209                        | 3.4842E+19                       | 1.0366E+17                             | 7.8825E-15                                  | 5.9674E-16                                  | 9.02915E-16                                         | 7.67            | 10701                             | 820                                           |
| VERM2        | 42.49638  | 3.13239   | 5            | 7.00            | 0.5195                        | 3.4749E+19                       | 1.0338E+17                             | 8.6910E-15                                  | 6.4313E-16                                  | 1.71144E-15                                         | 7.50            | 8496                              | 637                                           |
| VERM3        | 42.49391  | 3.13232   | 10           | 6.36            | 0.5198                        | 3.4769E+19                       | 1.0344E+17                             | 1.2771E-14                                  | 6.7238E-16                                  | 5.79121E-15                                         | 5.40            | 31659                             | 1711                                          |
| VERM4        | 42.47193  | 3.15398   | 7            | 1.71            | 0.5181                        | 3.4655E+19                       | 1.0311E+17                             | 5.8234E-15                                  | 4.5498E-16                                  | -1.15611E-15                                        | 7.91            | < DL                              |                                               |
| VERM5        | 42.39102  | 3.15390   | 3            | 2.27            | 0.5205                        | 3.4816E+19                       | 1.0358E+17                             | 6.0671E-15                                  | 6.0233E-16                                  | -9.12473E-16                                        | 10.00           | < DL                              |                                               |
| BRAV1        | 41.76295  | 2.99443   | 4            | 32.22           | 0.5205                        | 3.4816E+19                       | 1.0358E+17                             | 1.3262E-14                                  | 1.0138E-15                                  | 6.2822E-15                                          | 7.74            | 6788                              | 525                                           |
| BRAV3        | 41.76090  | 2.98738   | 3            | 30.04           | 0.5213                        | 3.4869E+19                       | 1.0374E+17                             | 1.2336E-14                                  | 6.9339E-16                                  | 5.35641E-15                                         | 5.75            | 6217                              | 358                                           |
| BRAV4        | 41.75500  | 2.97478   | 3            | 15.05           | 0.5150                        | 3.4448E+19                       | 1.0249E+17                             | 1.0659E-14                                  | 6.3190E-16                                  | 3.67968E-15                                         | 6.05            | 8422                              | 510                                           |
| BRAV5        | 41.70699  | 2.89881   | 3            | 13.26           | 0.5217                        | 3.4896E+19                       | 1.0382E+17                             | 2.3487E-14                                  | 1.0059E-15                                  | 1.65073E-14                                         | 4.45            | 43442                             | 1934                                          |
| BLANK-run1   |           |           |              |                 | 0.5159                        | 3.4508E+19                       | 1.0267E+17                             | 6.9796E-15                                  | 5.5998E-16                                  |                                                     |                 |                                   |                                               |
| <b>Run 2</b> |           |           |              |                 |                               |                                  |                                        |                                             |                                             |                                                     |                 |                                   |                                               |
| BRAV2        | 41.76149  | 2.99260   | 4            | 2.98            | 0.5191                        | 3.4722E+19                       | 1.0331E+17                             | 4.1439E-15                                  | 2.6107E-16                                  | 4.14391E-15                                         | 6.42            | 48284                             | 3098                                          |
| COSTA1       | -16.28077 | -73.45072 | 15           | 2.84            | 0.5215                        | 3.4883E+19                       | 1.0378E+17                             | 3.6606E-15                                  | 2.4160E-16                                  | 3.66055E-15                                         | 6.71            | 44961                             | 3017                                          |
| COSTA2       | -16.24747 | -73.54837 | 47           | 4.27            | 0.5201                        | 3.4789E+19                       | 1.0350E+17                             | 1.4448E-14                                  | 6.2128E-16                                  | 1.44484E-14                                         | 4.47            | 117715                            | 5260                                          |
| COSTA3       | -16.23203 | -73.58788 | 103          | 10.38           | 0.5193                        | 3.4735E+19                       | 1.0334E+17                             | 4.2685E-14                                  | 1.5366E-15                                  | 4.26846E-14                                         | 3.80            | 142839                            | 5427                                          |
| BLANK-run2   |           |           |              |                 | 0.5161                        | 3.4521E+19                       | 1.0271E+17                             | 3.2227E-15                                  | 2.2559E-16                                  |                                                     |                 |                                   |                                               |

$\pm 0.013) \times 10^{-11}$  [2]. The analytical  $1\sigma$  uncertainties include uncertainties in the AMS counting statistics, the uncertainty in the standard  $^{10}\text{Be}/^9\text{Be}$  ratio (0.1880% and 0.4172%, for Run 1 and Run 2, respectively, cf. table S1), an external AMS error of 0.5% [1], and chemical blank correction. A  $^{10}\text{Be}$  half-life of  $1.387 \pm 0.01$  Myrs was used [3, 4].

Among the samples, VERM4 and VERM5 (see section 3.A) have not been added to the study because of their  $^{10}\text{Be}$  concentration lower than the detection limit (Tab. S1). These results for VERM4 and VERM5 can be explained either by the mass of the quartz being too low for the  $^{10}\text{Be}$  measurement (Tab. S1), or by an erosion rate too high to allow the recording of a cosmogenic  $^{10}\text{Be}$  signal (see section 2.A).

## 2. CLIFF RETREAT RATE DETECTION LIMITS AND POTENTIAL BIAS

Here we try to estimate the limits of the method in terms of cliff retreat rates. The upper limit is analytical, being the lower detection limit of  $^{10}\text{Be}$ . The upper limit is determined by the geomorphological context and the Holocene sea level history.

### A. Upper limit of measurable retreat rate

The smallest measurable concentrations are conditioned by the quality of the chemical preparation and the measurement. The detection limit at ASTER AMS is several thousands of atoms depending on the blank quality. For a limit of 5000 atoms, and a sample of 10 g of quartz, a lower concentration limit can be estimated to  $\sim 500$  atoms  $\text{g}^{-1}$ . This lower concentration limit corresponds to the upper limit in terms of measurable retreat rate of about  $5 \text{ mm yr}^{-1}$ .

### B. Lower limit of measurable retreat rate

Low recession rates correspond to high  $^{10}\text{Be}$  concentrations, which do not pose any particular problem for measurement. On the other hand, the limit is likely to be set by geomorphic history. The sea level returned to a level close to the present ( $\pm 5$  m) around 6 kyrs BP [e.g., 5], leading to a renewed retreat of the cliffs [e.g., 7–10], and thus of the cliff erosion. It is expected that the erosion rate of the cliff increased largely around 6 kyrs BP. In terms of the cosmogenic isotope record, it is possible that the concentration currently measured represents a somewhat integrated signal over the two periods (before and after 6 kyr BP).

In order to test the bias introduced, we simulate an increase in erosion rates by a factor of 10 to 200, the latter value being an extreme that is barely plausible (Figure S1). Then we invert the calculated concentration into a constant erosion rate and we compare this rate with the rate prescribed in the model.

For this we consider an escarpment with a constant slope with a homogeneous erosion rate. Thus, we reduce the escarpment to a depth profile. We consider that the shielding and slope effect on the particle path length at depth  $z$  compensate each other as the escarpment slopes are  $45^\circ$  in average [11]. We then solve Equation S1 to find the  $^{10}\text{Be}$  concentration  $C$  for 120 points with one point every  $dz = 1$  cm at depth. So the simulated depth profile is 12 m in total.

$$\frac{dC}{dt} = -\lambda C + P \quad (\text{S1})$$

$$P = (P_{sp} e^{-\rho z / \Lambda_{sp}} + P_{sm} e^{-\rho z / \Lambda_{sm}} + P_{fm} e^{-\rho z / \Lambda_{fm}}) \quad (\text{S2})$$

Where the subscripts of  $^{10}\text{Be}$  production rate  $P$  refer to the contributions of spallation ( $'sp'$ ), slow muons ( $'sm'$ ) and fast muons ( $'fm'$ ).  $\Lambda_{sp}$ ,  $\Lambda_{sm}$  and  $\Lambda_{fm}$  [ $\text{M L}^2$ ] are the respective attenuation factors with depth ( $\Lambda_{sp} = 150 \text{ g cm}^{-2}$ ,  $\Lambda_{sm} = 1500 \text{ g cm}^{-2}$ ,  $\Lambda_{fm} = 4320 \text{ g cm}^{-2}$ ) [6].  $P_{sp}$ ,  $P_{sm}$  and  $P_{fm}$  are calculated using the same equations as in our manuscript based on [6] and [12]. The density  $\rho = 2.6 \text{ g cm}^{-3}$ .

We divide time into periods of constant erosion rate. The initial state is a  $^{10}\text{Be}$  concentration profile corresponding to an equilibrium profile given by the stationary solution of Equation S1, using the erosion rate of the first period. For each period of time, the time step  $dt$  is chosen so

that the eroded layer with the specified erosion rate is 1 cm ( $dz$ ). At each time step, the  $^{10}\text{Be}$  concentration stack is raised from  $dz$  and the  $^{10}\text{Be}$  concentration is updated at each depth point by removing the radioactive decay and by adding the  $^{10}\text{Be}$  production during the time step. The deeper point is assigned a  $^{10}\text{Be}$  concentration of 0 at  $\text{g}^{-1}$ . We can vary the erosion rate from a period to another and track the  $^{10}\text{Be}$  concentration at the surface through time.

To calculate the apparent constant erosion rate from this surface  $^{10}\text{Be}$  concentration, we use the same Equation (5) as we used to calculate our erosion rate in the manuscript. The relative difference between this erosion rate and the true instantaneous erosion rate is used to calculate the bias shown in Figure S1. In the worst case, the erosion rate is underestimated by 80%, so that it is unlikely that our estimates are biased by more than a factor 2.

We conclude from these tests that in the case where the retreat velocity increased 6 kyrs ago, the

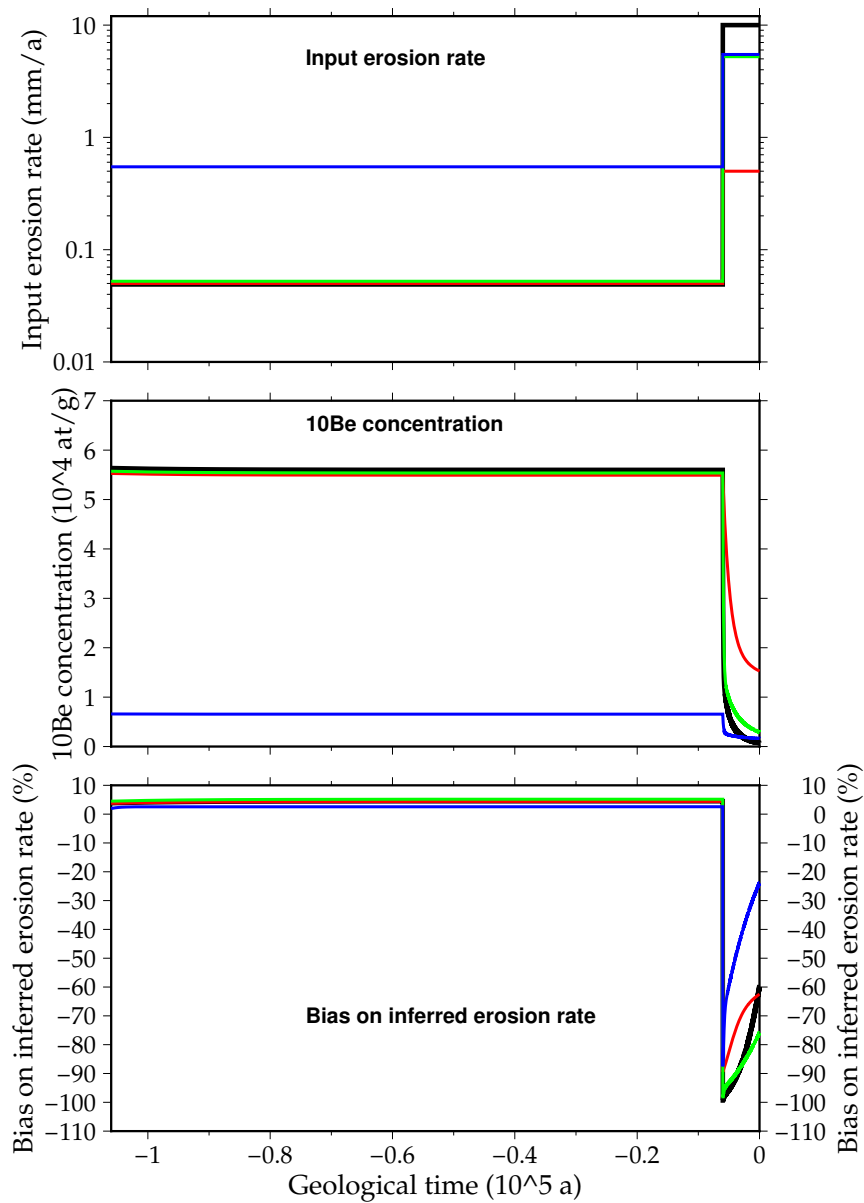

**Fig. S1.** (Previous page) Simulations of the  $^{10}\text{Be}$  concentration variation (central panel) associated with imposed variations in the erosion rate (top panel), and bias on the inferred erosion rate from these  $^{10}\text{Be}$  concentrations assuming a secular equilibrium between  $^{10}\text{Be}$  gain and loss (bottom panel), as we assume for real data. In these simulations, during 100 kyrs, the erosion rate is set constant; two values are tested (0.05, in red, green and black and 0.5 mm yr $^{-1}$ , in blue). Then the input erosion is multiplied by 10, 100 or 200 (up to 0.5 mm yr $^{-1}$ , red line, 5 mm yr $^{-1}$ , blue and green lines, and 10 mm yr $^{-1}$ , black line) in the last 6 kyrs, corresponding to the current sea-level highstand [e.g., 5]. To calculate the  $^{10}\text{Be}$  concentration, the production rate is fixed at 3.7 at g $^{-1}$  yr $^{-1}$  (sea-level at high latitude), and the  $^{10}\text{Be}$  production includes neutrons, fast muons and stop muons as per Braucher et al. [6]. The bottom panel shows the evolution of the bias when inferring the erosion rate from the  $^{10}\text{Be}$  concentration, as we do with real data. Note that in the case of a low initial erosion rate, the bias is slightly larger than 0 because the equation used to infer the erosion rate does not account for the radioactive decay. The predicted bias in our data can be read on the right y-axis of the bottom panel. In the worst case, the erosion rate is underestimated by 80% (green line). It is thus unlikely that our small erosion rates are underestimated by as much as one order of magnitude.

measurement made today truly reflects the real value to the correct order of magnitude. However, it should be noted that the lower the recession rates, the longer the integration time, which can be much longer than the Holocene (see Table 1). We recommend a use limited to integration times lower than 10-20 kyrs; it corresponds to retreat rates velocities  $\epsilon$  exceeding 0.03-0.05 mm yr $^{-1}$ .

### C. The case of BRAV2

BRAV2 is the only sample for which sediment could come from above the studied escarpment. Half of the drainage area  $A$  is located in the hills above the escarpment. If the hills area erodes very slowly compared to the coastal escarpment, then sediment coming from this area could lower our estimation of the escarpment erosion rate. In order to quantify this bias, we propose the following first-order model. We consider that the hills area and the escarpment area erode at two different rates  $\epsilon_1$  and  $\epsilon_2$ . Their respective mean production rates are  $P_1 = 6$  at g $^{-1}$  yr $^{-1}$  and  $P_2 = 4.4$  at g $^{-1}$  yr $^{-1}$ . We consider only spallation and we neglect radioactive decay. The mean  $^{10}\text{Be}$  concentration of the sampled sediment can be written as the ratio between the flux of  $^{10}\text{Be}$  and the flux of quartz:

$$\bar{C} = \frac{A/2 \cdot \epsilon_1 C_1 + \epsilon_2 C_2}{A/2 \cdot \epsilon_1 + \epsilon_2} \quad (\text{S3})$$

and assuming steady state

$$C_1 = \frac{LP_1}{\epsilon_1} \quad (\text{S4})$$

$$C_2 = \frac{LP_2}{\epsilon_2} \quad (\text{S5})$$

$$(\text{S6})$$

where  $L$  is the spallation length scale ( $\sim 0.65$  m). Inserting these equations into the previous one, and solving for  $\epsilon_2$ :

$$\epsilon_2 = \frac{L(P_1 + P_2)}{\bar{C}} - \epsilon_1 \quad (\text{S7})$$

The last equation gives the correct value of  $\epsilon_2$ , the erosion rate of the coastal escarpment. We can compare it to our estimation which neglects the contribution of the hills area. Our estimation of  $\epsilon_2$  is  $\epsilon_{2est}$  (here neglecting the contribution of muons):

$$\epsilon_{2est} \sim \frac{LP_2}{\bar{C}} \quad (\text{S8})$$

Comparing expressions for  $\epsilon_2$  and  $\epsilon_{2est}$  shows that their relative difference is essentially set by the ratio  $P_1/P_2$ , in particular if  $\epsilon_1$  is very small compared to  $\epsilon_2$ . It turns out that the relative

error of  $\epsilon_{2est}$  compared to  $\epsilon_2$  is necessarily smaller than -60% in absolute terms. This potential maximum error is too small to explain why the erosion rate of BRAV2 is around 5 times lower than the erosion rates of BRAV1, BRAV3 and BRAV4. We conclude that the potential contribution of the hills above the escarpment cannot change the order of magnitude of our estimated erosion rate for the escarpment above BRAV2 sample.

#### D. Summary

The method presented here allows to quantify the erosion rate of slowly evolving cliffs (0.05 to 5 mm yr<sup>-1</sup>). In this, it fills a gap, since it is estimated that the methods currently used are effective for velocities higher than 1 cm yr<sup>-1</sup>. We can note here that this gap is not completely filled since an alternative method for velocities of about 0.5-1 cm yr<sup>-1</sup> would be welcome.

The presented method performs an integration of the signal over periods ranging from a century (erosion rate  $\sim 5$  mm yr<sup>-1</sup>) to about ten thousand years (erosion rate  $\sim 0.05$  mm yr<sup>-1</sup>). In this last case, the integration covers two episodes of the cliff history characterized by retreat rates likely to be quite different: we have verified that the bias introduced does not exceed an order of magnitude.

### 3. SITE DESCRIPTION

#### A. VERM and BRAV series

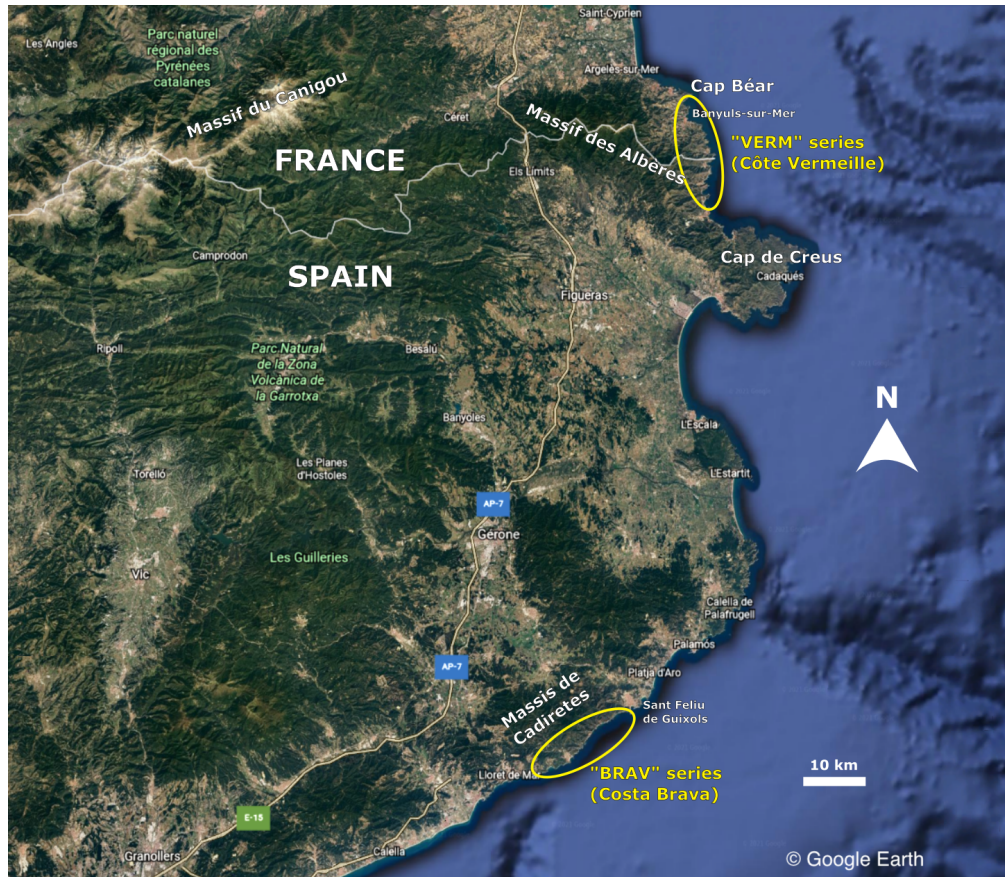

**Fig. S2.** Satellite image (Google Earth) showing location of the two sampling series carried out on the Mediterranean coast of the eastern Pyrenees, between France and Spain.

During November 8 and 9, 2021, two sampling series have been carried out on the Mediterranean coast of eastern Pyrenees, between France and Spain (Figure S2), by Rémi Bossis and Vincent Regard. During this campaign, 10 samples have been collected: 5 constituting the "VERM" series (VERM1, VERM2, VERM3, VERM4 and VERM5 on the French coast) and 5 constituting

the "BRAV" series (BRAV1, BRAV2, BRAV3, BRAV4 and BRAV5, on the Spanish coast). VERM4 and VERM5 have not been added to the study because of their lower  $^{10}\text{Be}$  concentration than the detection limit (see section 1 and Tab. S1).

#### A.1. VERM series

The samples of the VERM series (for "Côte Vermeille") have been collected, except for VERM5, next to the city of Banyuls-sur-Mer, France (Figure S3), on 8 November 2021. The VERM5 sample has been collected about 10 kilometers to the south, south of the French-Spanish border, the same day. Figure S4 shows geomorphological observations and interpretations on the cliffs for sample sites VERM1, VERM2 and VERM3. The rest of this section transcribes and illustrates the notes taken on the field for each VERM sample.

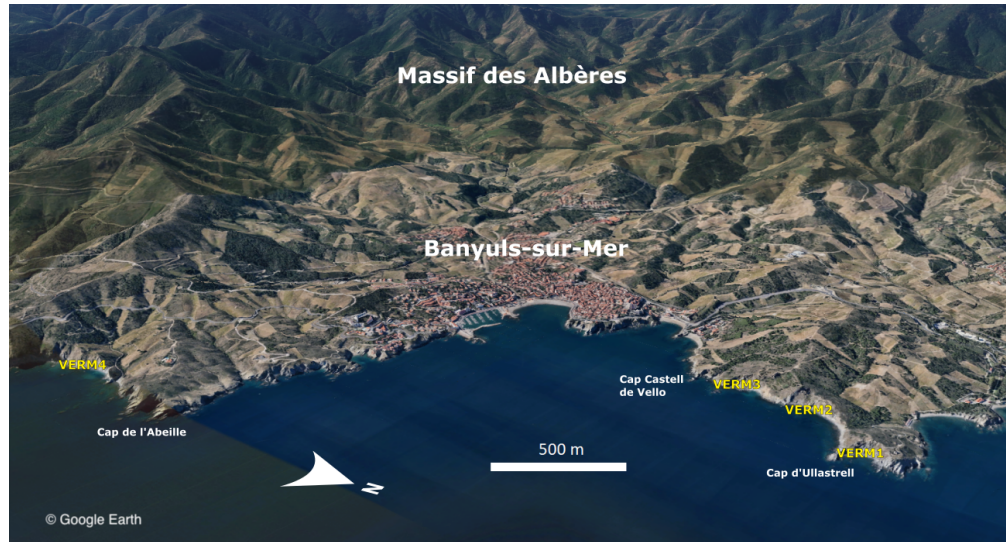

**Fig. S3.** 3D view (Google Earth) of the coast around Banyuls-sur-Mer. Locations of VERM1, VERM2, VERM3 and VERM4 are indicated in yellow.

##### VERM1:

Location: creek north of Cap d'Ullastrell, 2 km to the north of Banyuls-sur-Mer (Figs. S4 and S5).

GPS coordinates: 42.49926°N / 3.13484°E

Altitude: about 5 m above sea level

Cliff height: 15-20 m

Slope: 41°

Sampling: 6 points spaced about 3 to 5 m apart, consisting of mm- to cm-sized shale grains of light brown to grey colour.

Lithology, after the French geological map of Argelès-sur-Mer (scale 1:50 000): kE1: Alós d'Isil formation, generally greenish and banded pelites and sandstone-pelites.

##### VERM2:

Location: 350 m southwest of Cap d'Ullastrell (Figs. S4, S6 and S7).

GPS coordinates: 42.49638°N / 3.13239°E

Altitude: about 5 m above sea level

Cliff height: 20-30 m

Slope: 42°

Sampling: 6 points spaced about 5-7 m apart, consisting of mm- to cm-sized sized shale grains, light brown to grey in colour.

Lithology, after the French geological map of Argelès-sur-Mer (scale 1:50 000): Alós d'Isil formation, generally greenish and banded pelites and sandstone-pelites.

Remarks: Possible landslide of a few metres of the cliff sampled along a hundred metres of shoreline (Figure S6 and S7).

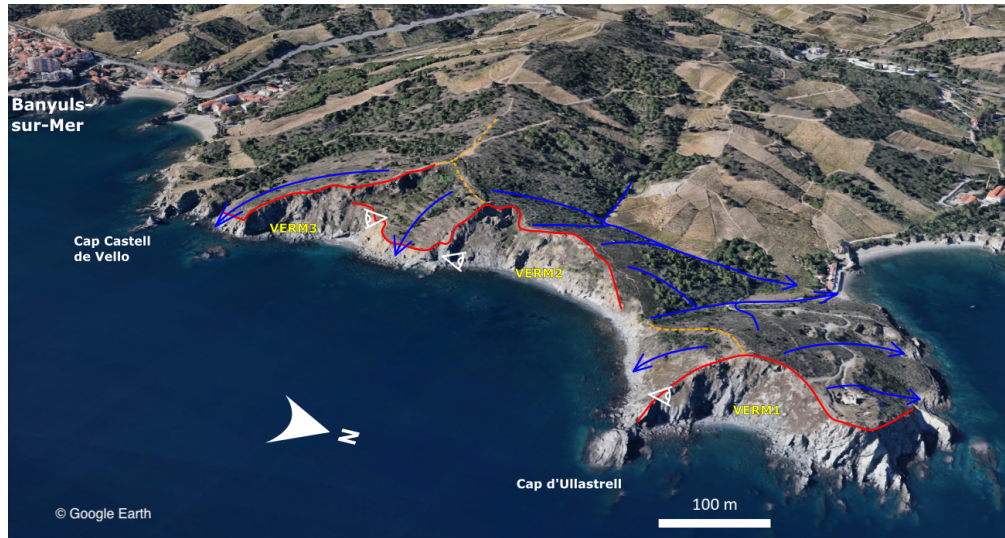

**Fig. S4.** 3D view (Goggle Earth) of the cliffs for VERM1, VERM2 and VERM3 (yellow). Red lines are interpreted cliffs top. Orange dashed lines are interpreted crests lines. Blue arrows are flow directions of the runoff water, interpreted from topography. White eye figures show locations and direction of pictures for each sample site.

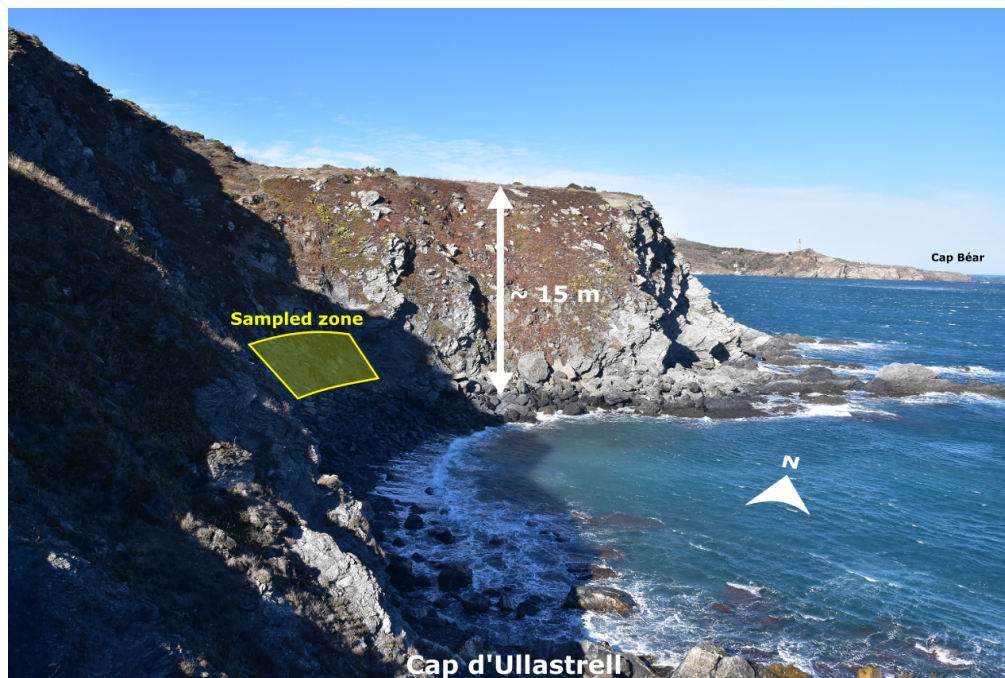

**Fig. S5.** Picture of the VERM1 sample site, seen from the south.

VERM3:  
 Location: 350 to 400 m south of the VERM2 site, about 200 m north of Cap Castell de Velló (Figure S4 and S8).  
 GPS coordinates: 42.49391°N / 3.13232°E  
 Altitude: about 10 m above sea level  
 Height of the cliff: 30-40 m  
 Slope: 46°  
 Sampling: 5 points scattered over about 50 metres, consisting of mm- to cm-sized shale grains,

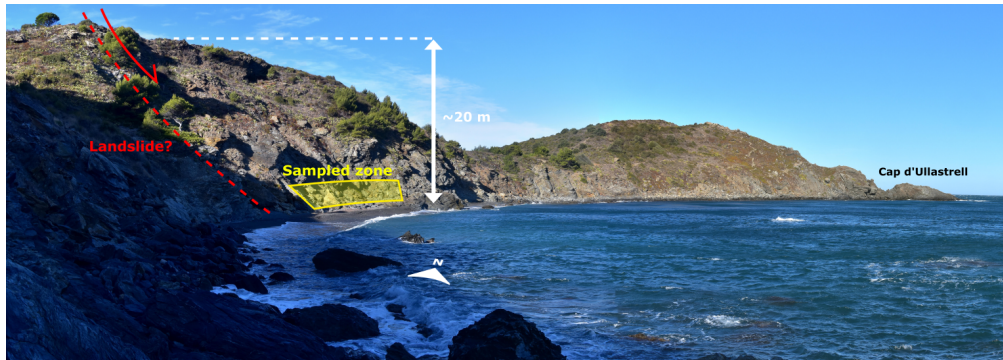

**Fig. S6.** Interpreted picture of the VERM2 sample site, seen from the south.

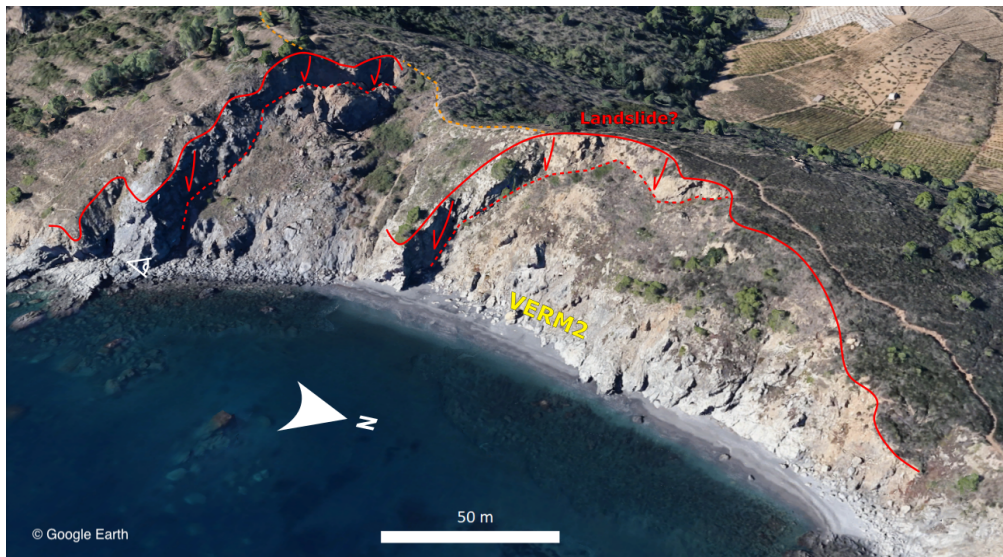

**Fig. S7.** Interpreted 3D view (Google Earth) of the cliff on the VERM2 sample site (yellow). Red lines are interpreted cliffs top. Orange dashed lines are interpreted crests lines. Red arrows show the possible movement of the cliff. The white eye figure shows the location and the direction of the picture in Figure S6.

light brown to grey in colour.

Lithology, after the French geological map of Argelès-sur-Mer (scale 1:50 000): Alós d'Isil formation, generally greenish and banded pelites and sandstone-pelites.

Remarks: smaller colluvium than at the VERM1 and VERM2 sites and consolidated by grass. We conclude that the cliff is probably less active than at the VERM1 and VERM2 sites. Large boulders and a platform raised by a few metres are protecting the base of the cliff (Figure S8).

#### VERM4:

Location: between Cap de la Vella and Cap Rederís, 2 km east-southeast of Banyuls-sur-Mer (Figs. S3, S9 and S10).

GPS coordinates: 42.47193°N / 3.15398°E

Altitude: 7-8 m above sea level

Cliff height: 15-20 m

Slope: 60°

Sampling: 2 points spaced 3 m apart, consisting of mm- to cm-sized shale grains, light brown to grey. Sparse colluvium.

Lithology, after the French geological map of Argelès-sur-Mer (scale 1:50 000): kE1: Alós d'Isil formation, generally greenish and banded pelites and sandstone-pelites.



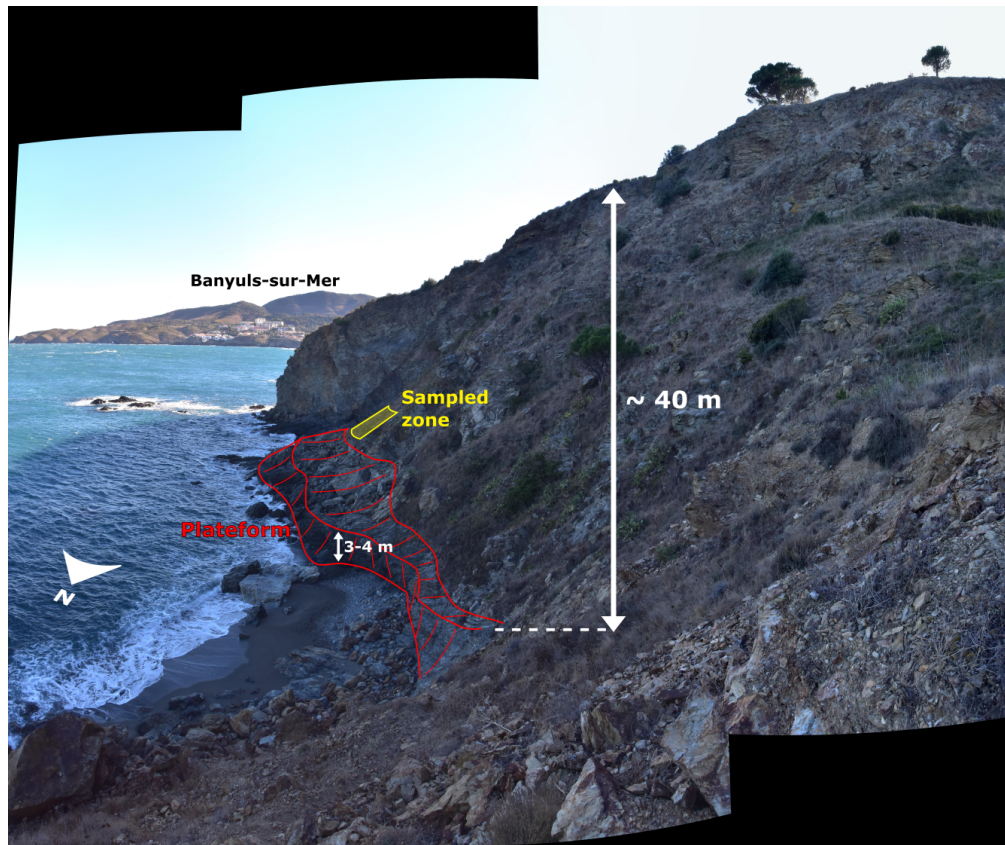

**Fig. S8.** Interpreted mosaic picture for the VERM3 sample site, seen from the north.

Remarks: steep cliff with a rocky platform dominating the sea by about 5 m, with large blocks and very little fine sediment. Colluvium collected high on the raised platform, somewhat sheltered from the waves (Figure S9). Possibly also a cliff detachment, as for VERM2 (Figure S10).

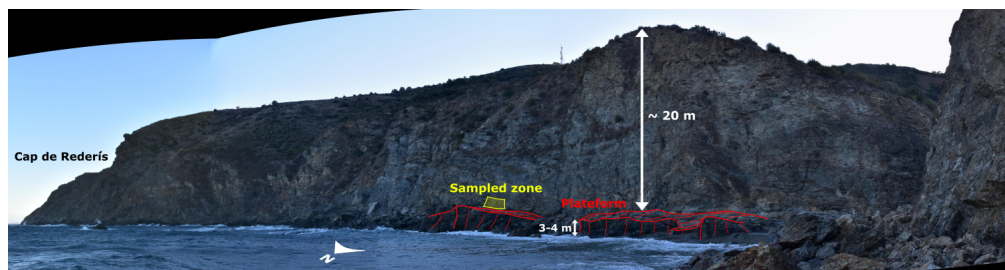

**Fig. S9.** Interpreted mosaic picture for the VERM4 sample site, seen from the north.

VERM5:

Location: small creek south of Garvet beach, about 1.5 km south of Colera, Spain (Figure S11 and S12).

GPS coordinates: 42.39102°N / 3.15390°E

Altitude: 3-4 m above sea level

Cliff height: 10-15 m

Slope: not measured (probably around 40°)

Sampling: 4 points spaced 3 to 5 m apart, consisting of mm- to cm-sized shale grains, light brown to grey colour.

Lithology: Catalan geological map "Llança" at 1:50 000: ÇOrp3: "Pelites negres amb intercalacions

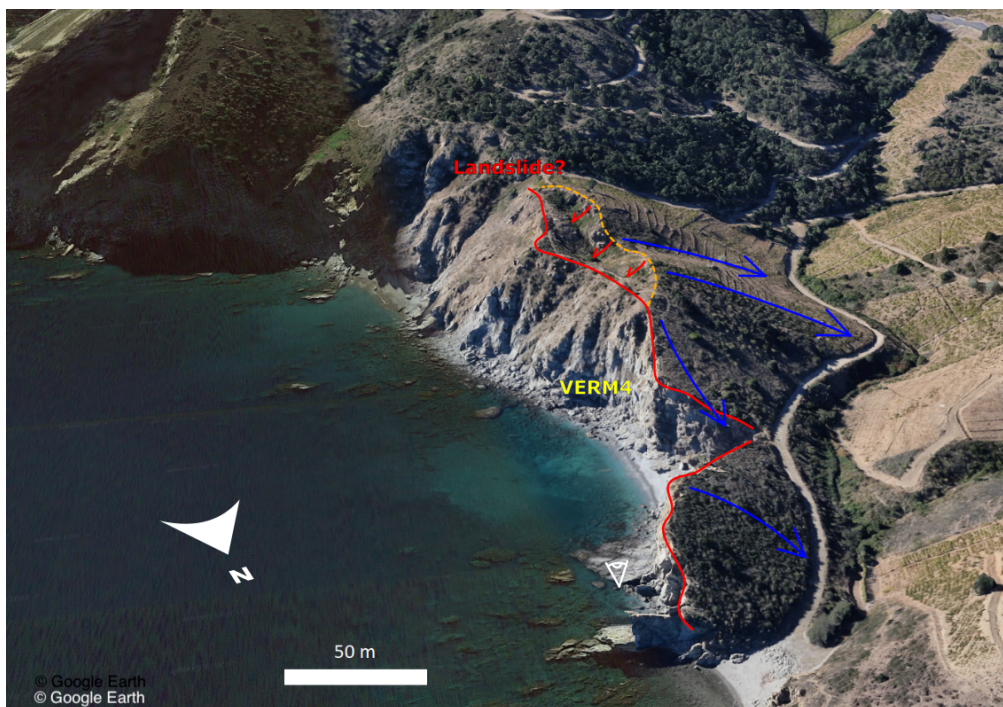

**Fig. S10.** Interpreted 3D view (Google Earth) of the cliff on the VERM4 sample site (yellow). Red lines are interpreted cliffs top. Orange dashed line is an interpreted crest line. Blue arrows are flow directions of the runoff water, interpreted from topography. Red arrows show the possible movement of the cliff. The white eye figure shows the location and the direction of the picture in Figure S9.

gresoses o limolítiques".

Remarks: site not initially selected because of questionable morphology and a non-negligible risk of contamination from the materials from above the cliff. Indeed, a road is built about 15 m from the top of the cliff (Figure S11 and S12), the construction of which may have released some fresh material.

#### **A.2. BRAV series**

The samples of the BRAV series (for "Costa Brava") have been collected, except for BRAV5, next to the small city of Canyet de Mar, Spain (Figure S13), on 9 November 2021. The BRAV5 sample has been collected next to Cap de Bou, about 10 kilometers to the southwest, the same day. Figure S14 shows geomorphological observations and interpretations on the cliffs for sample sites BRAV1, BRAV2 and BRAV3. The rest of this section transcribes and illustrates the notes taken on the field for each BRAV sample.

##### BRAV1:

Location: Cala Joana, cove located 3.5 km southwest of Sant Feliu de Guíxols and 1 km east of Canyet de Mar (Figs. S13, S14 and S15).

GPS coordinates: 41.76295°N / 2.99443°E

Altitude: 3-5 m above sea level

Cliff height: 100-120 m

Slope: 53°

Sampling: 6 points spaced 5-10 m apart, consisting of mm- to cm-sized gravels, ochre colour. Large colluvium cones flowing onto a pebble beach.

Lithology: Catalan geological map "Baix Empordà" at 1:50 000: Glg: "Leucogranits de gra groller".

##### BRAV2:

Location: Es Dofinet de Terra, about 200 m southwest of Cala Joana (Figs. S14 and S16).

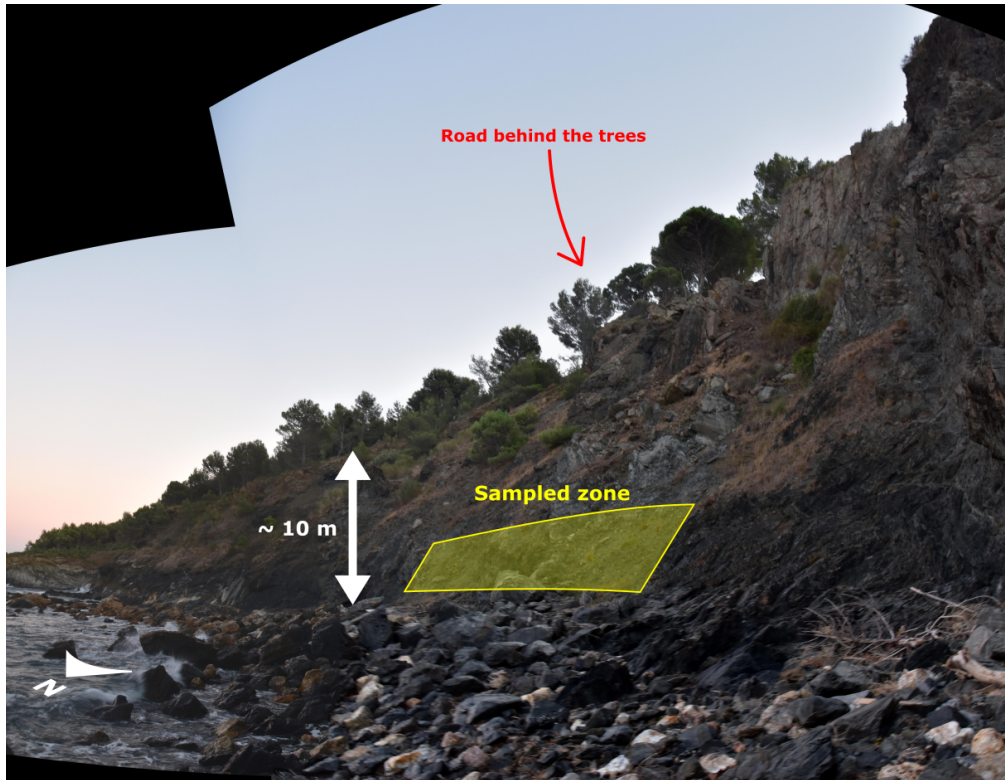

**Fig. S11.** Mosaic picture of the VERM5 sample site, seen from north.

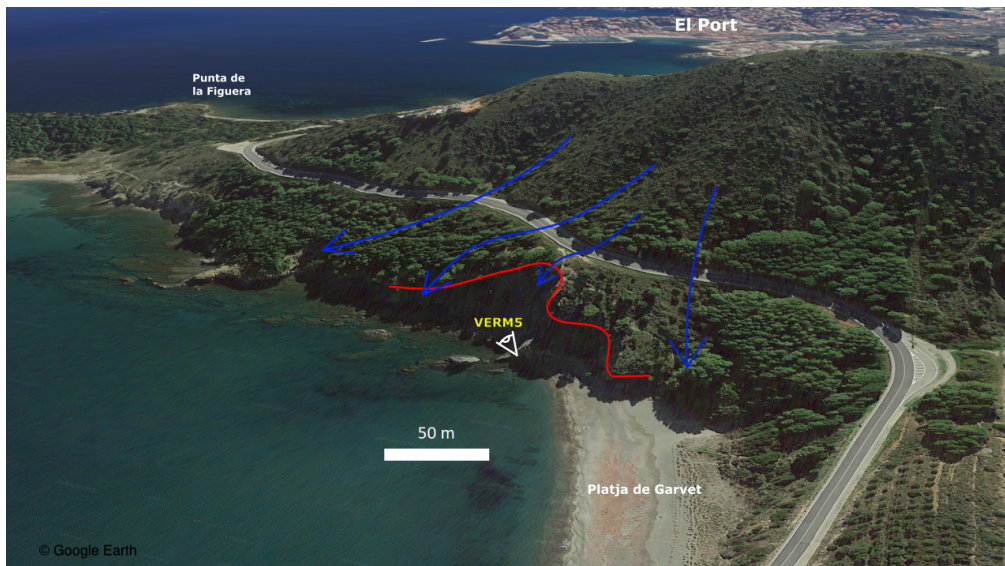

**Fig. S12.** Interpreted 3D view (Google Earth) of the cliff on the VERM5 sample site (yellow). The red line is the interpreted cliff top. Blue arrows are flow directions of the runoff water, interpreted from topography. The white eye figure shows the location and the direction of the picture in the Figure S11.

GPS coordinates: 41.76149°N / 2.99260°E  
 Altitude: 3-5 m above sea level  
 Cliff height: 80-100 m  
 Slope: 45°

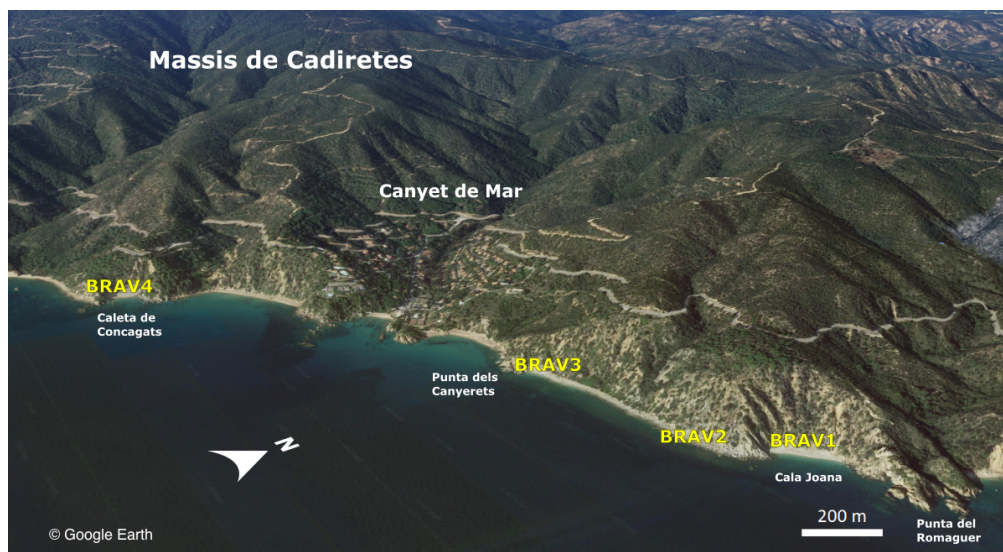

**Fig. S13.** 3D view (Google Earth) of the coast around Canyet de Mar. Locations of BRAV1, BRAV2, BRAV3 and BRAV4 are indicated in yellow.

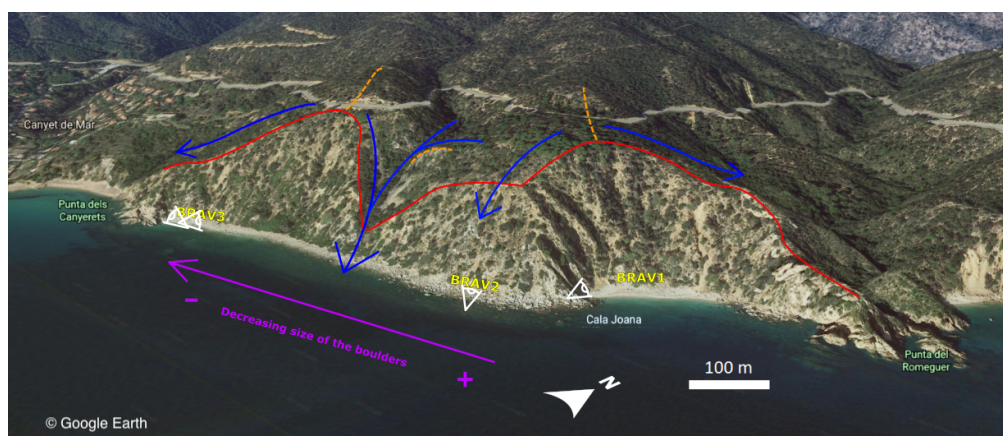

**Fig. S14.** Interpreted 3D view (Google Earth) of the cliffs for BRAV1, BRAV2 and BRAV3 (yellow). The red line is the interpreted cliff top. Orange dashed lines are interpreted crests lines. Blue arrows are flow directions of the runoff water, interpreted from topography. White eye figures show the location and the direction of the picture for each sample site. The purple arrow indicate the direction of the decreasing size of the boulders at the cliff base between BRAV2 and BRAV3 sample sites.

Sampling: 4 points spaced 3 to 4 m apart, consisting of mm- to cm-sized gravel, ochre colour.  
 Lithology: Catalan geological map "Baix Empordà" at 1:50 000: Glg: "Leucogranits de gra groller".  
 Remarks: cliff protected by large granite blocks, the platform appears locally at the base of the cliff (Figure S16). Cementing of some pebbles gravels by concretions of biological origin. Site not initially selected because of a non-negligible risk of contamination from the materials from above the cliff (Figure S14).

**BRAV3:**

Location: 50 to 100 m east of Punta dels Canyerets, about 400 m west of BRAV2 (Figure S14 and S17).

GPS coordinates: 41.76090°N / 2.98738°E

Altitude: 3-4 m above sea level

Cliff height: 80-100 m

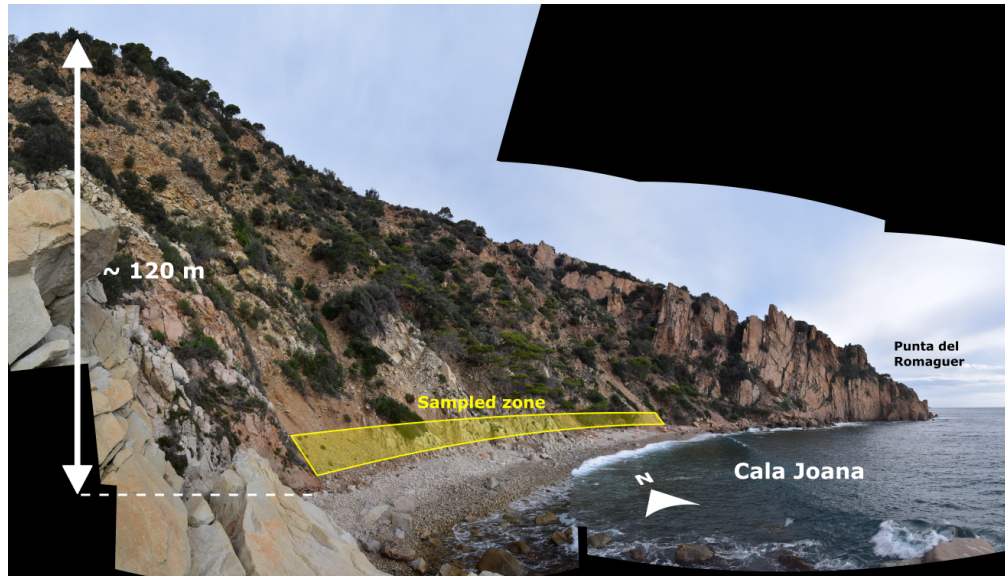

**Fig. S15.** Mosaic picture of the BRAV1 sample site, seen from the southwest.

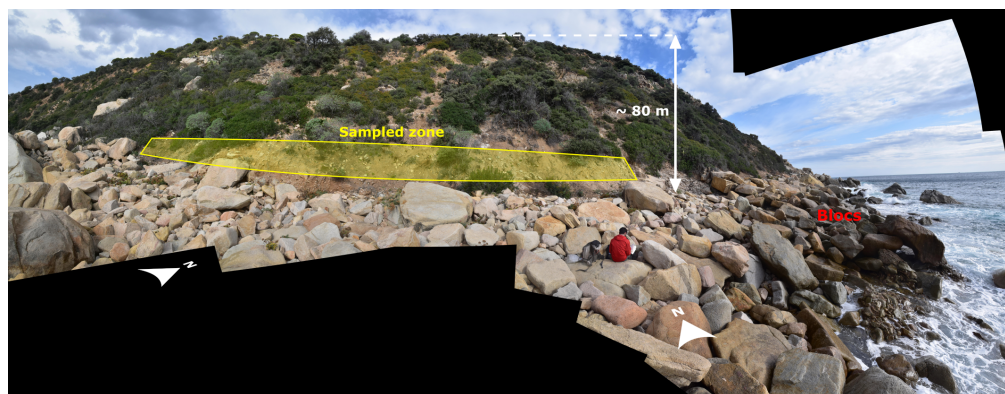

**Fig. S16.** Mosaic picture of the BRAV2 sample site, seen from the south (facing the cliff).

Slope: 48°

Sampling: 5 points, 4 spaced 4-5 m apart in the east and 1 spaced about 30 m apart, the most westerly. mm- to cm-sized irregular grains, light brown colour.

Lithology: Catalan geological map "Baix Empordà" at 1:50 000: Glg: "Leucogranits de gra groller".

Remarks: unlike the large boulders of the BRAV2 site, the BRAV3 site exhibits smaller boulders and pebbles (Figure S14 and S17). Large black to greenish xenoliths in granites.

#### BRAV4:

Location: Caleta de Concagrats, small cove 800 m southwest of Canyet de Mar (Figs. S13, S18 and S19).

GPS coordinates: 41.75500°N / 2.97478°E

Altitude: 3-4 m above sea level

Height of the cliff: 60-80 m

Slope: 55°

Sampling : 6 points spaced 5 to 7 m apart, consisting of mm- to cm-sized grains of brown color.

Lithology: Catalan geological map "Baix Empordà" at 1:50 000: Glg: "Leucogranits de gra groller".

Remarks: quartz-rich colluvium over granite blocks on top of a beach made of coarse ochre sand (Figure S18). Numerous pegmatites and xenoliths. A road is built about ten meters from the top of the cliff (Figure S19).

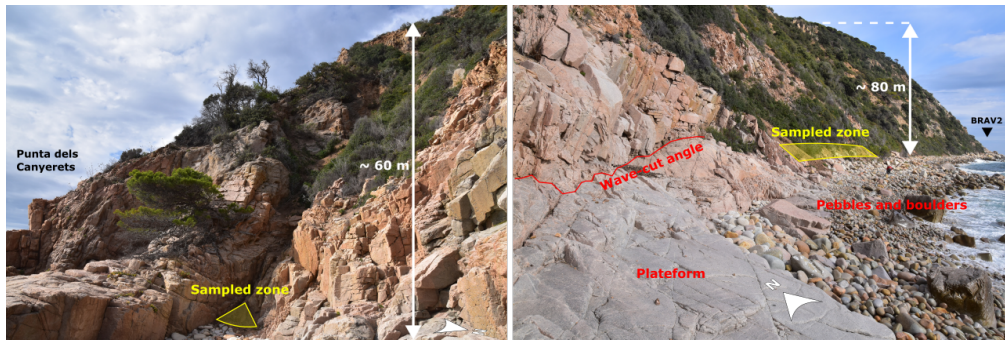

**Fig. S17.** Interpreted pictures of the BRAV3 sample site, seen from the east (left) and the southwest (right).

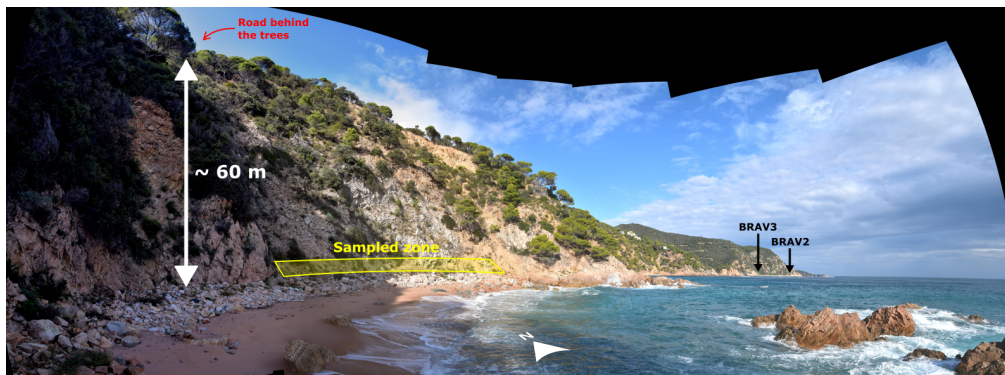

**Fig. S18.** Mosaic picture of the BRAV4 sample site, seen from the southwest.

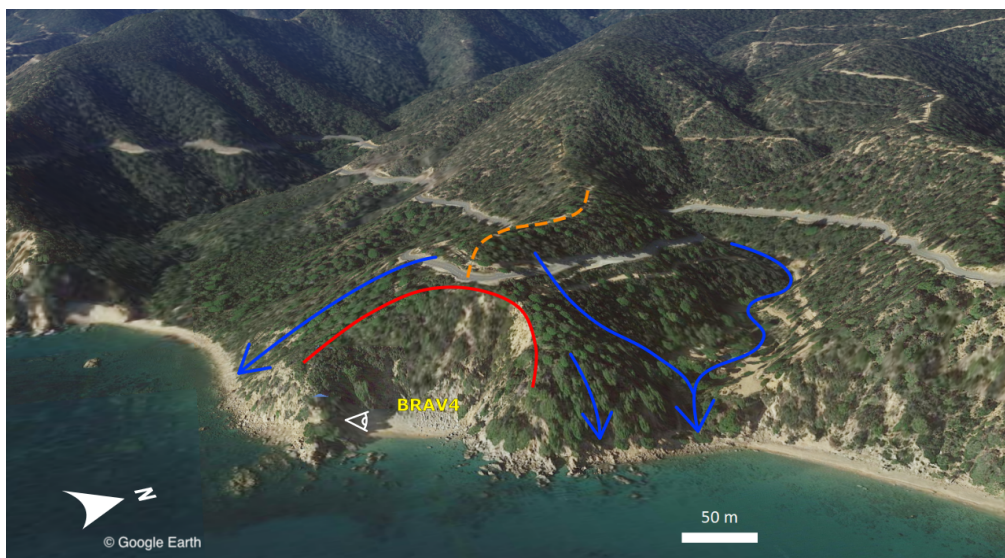

**Fig. S19.** Interpreted 3D view (Google Earth) of the cliff for the BRAV4 sample site (yellow). The red line is the interpreted cliff top. The orange dashed line is an interpreted crest line. Blue arrows are flow directions of the runoff water, interpreted from topography. The white eye figure shows the location and the direction of the picture in the Figure S18.

BRAV5:

Location: Southern end of the Platja de Portopí, about 100 m northwest of Cap de Bou (Figs. S20 and S21).

GPS coordinates: 41.70699°N / 2.89881°E

Altitude: 3-4 m above sea level

Cliff height: 40-60 m

Slope: 54°

Sampling: 4 points spaced about 10 m apart.

Lithology: Catalan geological map "Selva" at 1:50 000: Ggd: "Granodiorites and alkaline granites".

Remarks: heavily vegetated cliff, with many trees, making it difficult to observe the cliff top (Figure S20). Presence of dwellings above the cliff, but not directly upstream of the sampling site, about 50 m further north (Figure S21).

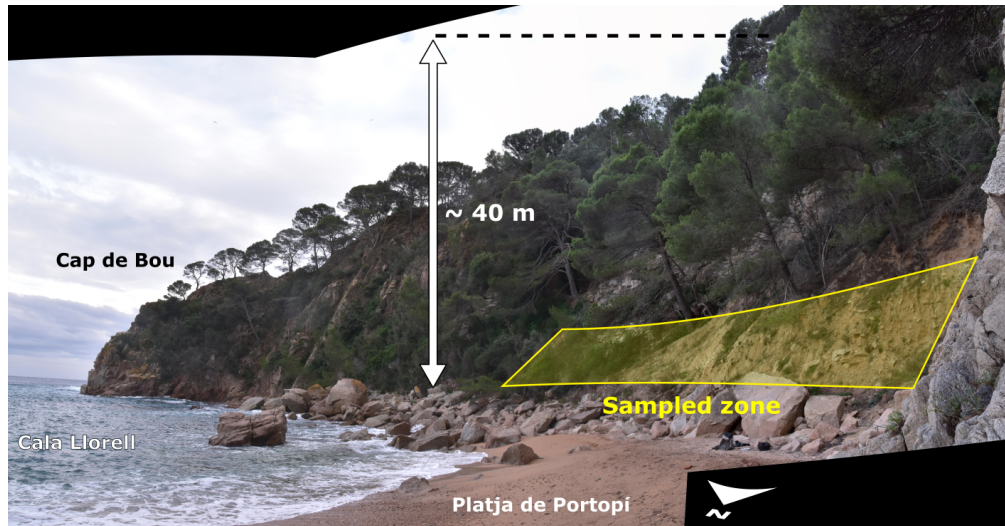

**Fig. S20.** Mosaic picture of the BRAV5 sample site, seen from the north.

**B. COSTA series**

At the same time as the campaign on the Mediterranean coast of eastern Pyrenees, another sampling campaign was carried out on the Pacific coast of south Peru, southeast of the city of Atico (Figure S22), by Sébastien Carretier. During this campaign, 3 samples have been collected (COSTA1, COSTA2 and COSTA3), forming the "COSTA" series. The rest of this section transcribes and illustrates the notes taken on the field for each COSTA sample.

COSTA1:

Location: Around 20 km south of Atico, from the main road along the coastline (Figs. S22 and S23).

GPS coordinates: -16.28077°N / -73.45072°E

Altitude: 15 m above sea level

Height of the cliff: 340-400 m

Sampling: multiple points along a 50 m stretch of the cliff base.

Remarks: the slope is very steep (Figure S23).

COSTA2:

Location: Around 10 km south of Atico, over a narrow marine terrace (Figure S22).

GPS coordinates: -16.24747°N / -73.54837°E

Altitude: 47 m above sea level

COSTA3:

Location: at the southern entrance of Atico (Figs. S22 and S24).

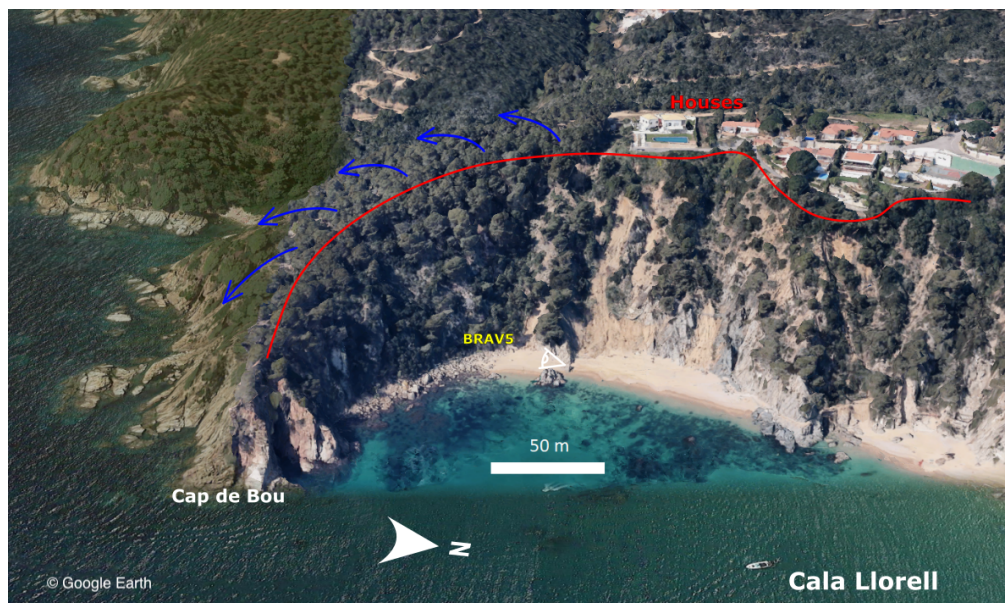

**Fig. S21.** Interpreted 3D view (Google Earth) of the cliff for the BRAV5 sample site (yellow). The red line is the interpreted cliff top. Blue arrows are flow directions of the runoff water, interpreted from topography. The white eye figure show the location and the direction of the picture in the Figure S20.

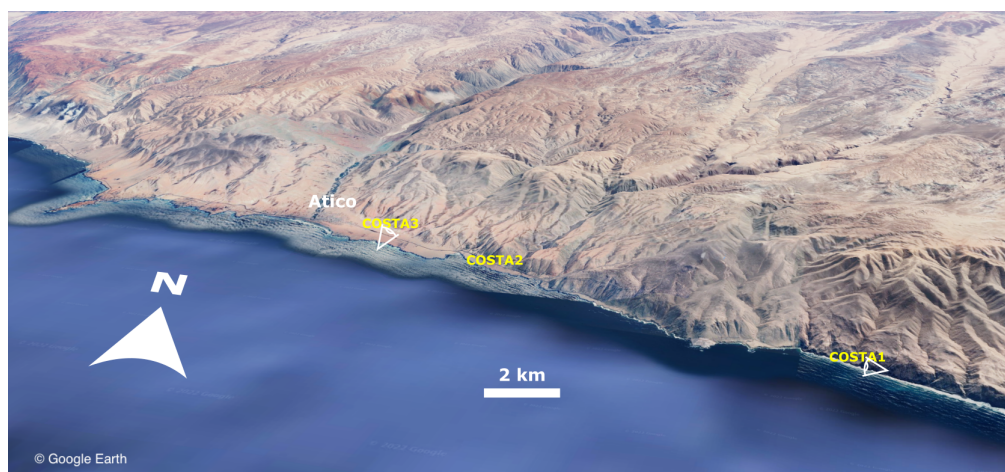

**Fig. S22.** 3D view (Google Earth) of the coast around Atico. Locations of COSTA1, COSTA2 and COSTA3 are indicated in yellow.

GPS coordinates: -16.23203°N / -73.58788°E

Altitude: 103 m above sea level

Remarks: very wide marine terrace. Sampling on the inflection point of the slope to avoid the sedimentation zone (Figure S24).

## REFERENCES

1. M. Arnold, S. Merchel, D. L. Bourlès, R. Braucher, L. Benedetti, R. C. Finkel, G. Aumaître, A. Gott dang, and M. Klein, "The French accelerator mass spectrometry facility ASTER: Improved performance and developments," Nucl. Instruments Methods Phys. Res. Sect. B: Beam Interactions with Mater. Atoms **268**, 1954–1959 (2010).



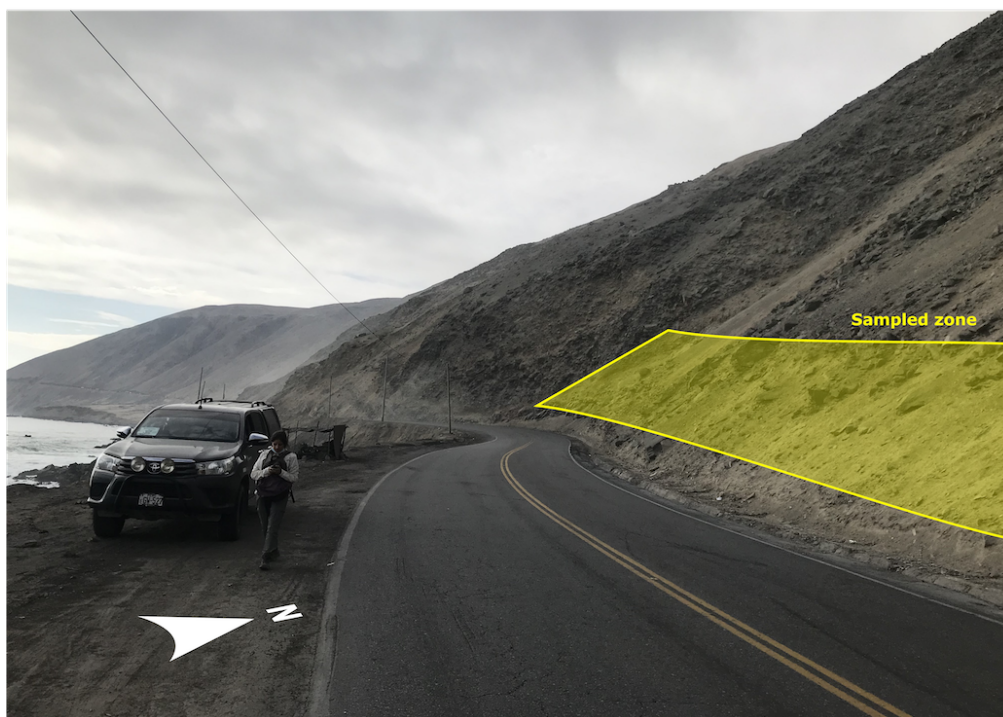

**Fig. S23.** Picture of the COSTA1 sample site, seen from the east. The sampling has been performed well above any effect of the road cut.

2. R. Braucher, V. Guillou, D. L. Bourlès, M. Arnold, G. Aumaître, K. Keddadouche, and E. Nottoli, "Preparation of ASTER in-house  $^{10}\text{Be}/^{9}\text{Be}$  standard solutions," *Nucl. Instruments Methods Phys. Res. Sect. B: Beam Interactions with Mater. Atoms* **361**, 335–340 (2015).
3. J. Chmeleff, F. von Blanckenburg, K. Kossert, and D. Jakob, "Determination of the Be-10 half-life by multicollector ICP-MS and liquid scintillation counting," *Nucl. Instruments & Methods In Phys. Res. Sect. B-Beam Interactions With Mater. And Atoms* **268**, 192–199 (2010).
4. G. Korschinek, A. Bergmaier, T. Faestermann, U. Gerstmann, K. Knie, G. Rugel, A. Wallner, I. Dillmann, G. Dollinger, and C. L. von Gostomski, "A new value for the half-life of  $^{10}\text{Be}$  by Heavy-Ion Elastic Recoil Detection and liquid scintillation counting," *Nucl. Instruments Methods Phys. Res. Sect. B: Beam Interactions with Mater. Atoms* **268**, 187–191 (2010).
5. R. Bintanja and R. S. W. van de Wal, "North American ice-sheet dynamics and the onset of 100,000-year glacial cycles," *Nature* **454**, 869–872 (2008).
6. R. Braucher, E. T. Brown, D. L. Bourles, and F. Colin, "In situ produced Be-10 measurements at great depths: implications for production rates by fast muons," *Earth And Planet. Sci. Lett.* **211**, 251–258 (2003).
7. W. J. Stephenson and R. M. Kirk, "Development of shore platforms on Kaikoura Peninsula, South Island, New Zealand - Part one: The role of waves," *Geomorphology* **32**, 21–41 (2000).
8. A. S. Trenhaile, "Rock coasts, with particular emphasis on shore platforms," *Geomorphology* **48**, 7 (2002).
9. W. P. de Lange and V. G. Moon, "Estimating long-term cliff recession rates from shore platform widths," *Eng. Geol.* **80** (2005).
10. V. Regard, T. Dewez, D. L. Bourlès, R. S. Anderson, A. Duperret, S. Costa, L. Leanni, E. Lasseur, K. Pedoja, and G. M. Maillet, "Late Holocene seacliff retreat recorded by  $^{10}\text{Be}$  profiles across a coastal platform: Theory and example from the English Channel," *Quat. Geochronol.* **11**, 87–97 (2012).
11. R. A. DiBiase, "Increasing vertical attenuation length of cosmogenic nuclide production on steep slopes negates topographic shielding corrections for catchment erosion rates." *Earth Surf. Dyn.* **6** (2018).
12. J. Stone, "Air pressure and cosmogenic isotope production,"

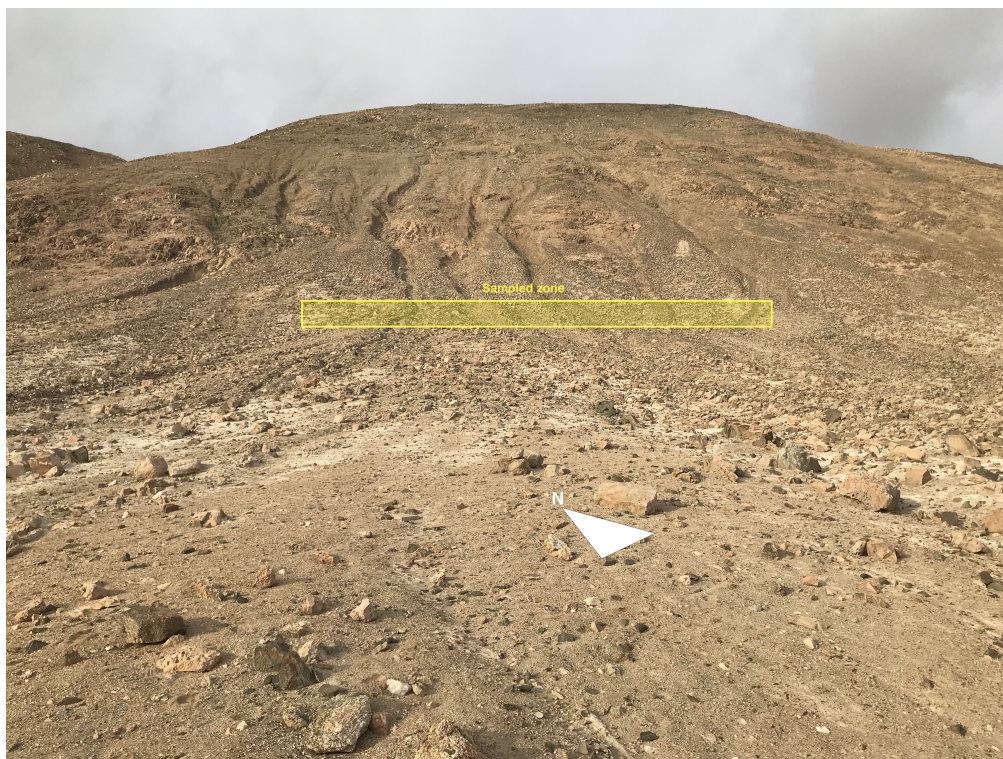

**Fig. S24.** Picture of the COSTA3 sample site, seen from the south.

105, 23753–23759 (2000).
